# Supplementary material for: Abiotic–Biotic Interrelations in the Context of Stabilized Ecological Potential of Post-Mining Waters
Source: MDPI journal article supplement (doi:10.3390/w15193328), 2023-09-22
Supplement: s1 [file s1]

# Supplementary Material

Table S1. Physicochemical parameters of water in the Kamień sedimentation pond (inflow and chambers: C-1, C-2, C-3) during the growing seasons in 2014-2015 and 2018-2019 (mean,  $\pm$ SD).

| Parameters                    | 2014 - 2015 |             |             |             | 2018 - 2019 |             |             |             |
|-------------------------------|-------------|-------------|-------------|-------------|-------------|-------------|-------------|-------------|
|                               | Inflow      | C-1         | C-2         | C-3         | Inflow      | C-1         | C-2         | C-3         |
| T                             | 14.5        | 15.6        | 14.9        | 15.5        | 15.2        | 16.8        | 16.5        | 16.7        |
| (°C)                          | $\pm 4.8$   | $\pm 5.2$   | $\pm 4.9$   | $\pm 5.2$   | $\pm 4.0$   | $\pm 4.3$   | $\pm 4.3$   | $\pm 4.4$   |
| SDD                           | n.m.*       | 0.53        | 0.54        | 0.58        | n.m.*       | 0.75        | 0.84        | 0.79        |
| (m)                           |             | $\pm 0.14$  | $\pm 0.10$  | $\pm 0.16$  |             | $\pm 0.37$  | $\pm 0.33$  | $\pm 0.40$  |
| Turbidity                     | 13.5        | 25.2        | 24.9        | 17.1        | 20.9        | 22.2        | 20.0        | 18.7        |
| (NTU)                         | $\pm 3.7$   | $\pm 14.8$  | $\pm 14.0$  | $\pm 4.6$   | $\pm 12.3$  | $\pm 9.6$   | $\pm 10.4$  | $\pm 7.4$   |
| TSS                           | 12.7        | 17.7        | 14.3        | 9.8         | 18.2        | 16.8        | 17.3        | 17.3        |
| (mg L <sup>-1</sup> )         | $\pm 5.1$   | $\pm 11.3$  | $\pm 4.9$   | $\pm 5.3$   | $\pm 12.1$  | $\pm 13.5$  | $\pm 12.8$  | $\pm 13.1$  |
| PO <sub>4</sub> <sup>3-</sup> | 0.030       | 0.031       | 0.033       | 0.019       | 0.028       | 0.020       | 0.018       | 0.017       |
| (mg L <sup>-1</sup> )         | $\pm 0.020$ | $\pm 0.022$ | $\pm 0.019$ | $\pm 0.012$ | $\pm 0.010$ | $\pm 0.014$ | $\pm 0.008$ | $\pm 0.009$ |
| TN                            | 0.305       | 0.307       | 0.278       | 0.216       | 0.342       | 0.311       | 0.316       | 0.343       |
| (mg L <sup>-1</sup> )         | $\pm 0.076$ | $\pm 0.147$ | $\pm 0.079$ | $\pm 0.069$ | $\pm 0.109$ | $\pm 0.112$ | $\pm 0.095$ | $\pm 0.198$ |
| NO <sub>3</sub> <sup>-</sup>  | 0.134       | 0.161       | 0.150       | 0.129       | 0.139       | 0.119       | 0.127       | 0.121       |
| (mg L <sup>-1</sup> )         | $\pm 0.027$ | $\pm 0.050$ | $\pm 0.043$ | $\pm 0.039$ | $\pm 0.047$ | $\pm 0.037$ | $\pm 0.051$ | $\pm 0.078$ |
| NH <sub>4</sub> <sup>3+</sup> | 0.057       | 0.065       | 0.066       | 0.036       | 0.057       | 0.029       | 0.043       | 0.034       |
| (mg L <sup>-1</sup> )         | $\pm 0.064$ | $\pm 0.051$ | $\pm 0.051$ | $\pm 0.035$ | $\pm 0.045$ | $\pm 0.028$ | $\pm 0.037$ | $\pm 0.035$ |
| Cl <sup>-</sup>               | 105.5       | 88.6        | 100.9       | 92.6        | 99.2        | 89.0        | 85.1        | 82.7        |
| (mg L <sup>-1</sup> )         | $\pm 12.8$  | $\pm 5.0$   | $\pm 18.3$  | $\pm 13.8$  | $\pm 24.7$  | $\pm 20.4$  | $\pm 16.7$  | $\pm 15.9$  |
| Mg <sup>2+</sup>              | 11.6        | 14.1        | 14.0        | 14.2        | 30.4        | 29.7        | 21.8        | 21.1        |
| (mg L <sup>-1</sup> )         | $\pm 4.2$   | $\pm 2.7$   | $\pm 4.6$   | $\pm 3.7$   | $\pm 10.3$  | $\pm 12.3$  | $\pm 11.2$  | $\pm 12.9$  |

\* not measured

Table S2. Average content of trace elements in the Kamień sedimentation pond during the growing seasons in 2014-2015 and 2018-2019 with classification of water quality [35].

| Parameter                      | Range     | Average | $\pm$ SD | Threshold value                 | Water quality class |
|--------------------------------|-----------|---------|----------|---------------------------------|---------------------|
| Ag ( $\mu$ g L <sup>-1</sup> ) | <0.01     | <0.01   | <0.01    | $\leq 0.005$ mg L <sup>-1</sup> | I-II                |
| Al ( $\mu$ g L <sup>-1</sup> ) | 1.53-4.04 | 2.73    | 0.95     | $\leq 0.400$ mg L <sup>-1</sup> | I-II                |
| As ( $\mu$ g L <sup>-1</sup> ) | <0.01     | <0.01   | <0.01    | $\leq 0.050$ mg L <sup>-1</sup> | I-II                |

|                          |               |        |       |                           |      |
|--------------------------|---------------|--------|-------|---------------------------|------|
| B (µg L <sup>-1</sup> )  | 0.77-5.13     | 2.75   | 1.81  | ≤2.000 mg L <sup>-1</sup> | I-II |
| Ba (µg L <sup>-1</sup> ) | 109.25-113.94 | 112.21 | 2.05  | ≤0.500 mg L <sup>-1</sup> | I-II |
| Cd (µg L <sup>-1</sup> ) | 0.01-0.02     | 0.01   | <0.01 | ≤0.080 µg L <sup>-1</sup> | I-II |
| Cr (µg L <sup>-1</sup> ) | 2.73-3.48     | 3.04   | 0.32  | ≤0.050 mg L <sup>-1</sup> | I-II |
| Co (µg L <sup>-1</sup> ) | 0.69-0.86     | 0.79   | 0.08  | ≤0.050 mg L <sup>-1</sup> | I-II |
| Cu (µg L <sup>-1</sup> ) | 0.75-3.51     | 1.82   | 0.89  | ≤0.050 mg L <sup>-1</sup> | I-II |
| Mo (µg L <sup>-1</sup> ) | 0.07-0.75     | 0.36   | 0.29  | ≤0.040 mg L <sup>-1</sup> | I-II |
| Ni (µg L <sup>-1</sup> ) | 2.89-3.90     | 3.21   | 0.33  | ≤4.000 µg L <sup>-1</sup> | I-II |
| Pb (µg L <sup>-1</sup> ) | 0.17-1.02     | 0.46   | 0.34  | ≤1.200 µg L <sup>-1</sup> | I-II |
| Se (µg L <sup>-1</sup> ) | <0.01         | <0.01  | <0.01 | ≤0.020 mg L <sup>-1</sup> | I-II |
| Ti (µg L <sup>-1</sup> ) | 10.76-12.48   | 11.27  | 0.82  | ≤0.050 mg L <sup>-1</sup> | I-II |
| V (µg L <sup>-1</sup> )  | 0.51-0.78     | 0.59   | 0.13  | ≤0.050 mg L <sup>-1</sup> | I-II |
| Zn (µg L <sup>-1</sup> ) | 20.30-32.80   | 25.92  | 4.92  | ≤1.000 mg L <sup>-1</sup> | I-II |
| Tl (µg L <sup>-1</sup> ) | 0.02-0.10     | 0.06   | 0.03  | ≤0.002 mg L <sup>-1</sup> | I-II |
| Br (µg L <sup>-1</sup> ) | 74.95-77.97   | 76.57  | 1.63  | *                         | *    |
| Fe (mg L <sup>-1</sup> ) | 0.03-2.90     | 0.45   | 0.50  | *                         | *    |
| Hg (µg L <sup>-1</sup> ) | <0.01         | <0.01  | <0.01 | *                         | *    |
| I (µg L <sup>-1</sup> )  | 19.98-23.38   | 21.36  | 1.44  | *                         | *    |
| Mn (mg L <sup>-1</sup> ) | 0.05-1.85     | 0.44   | 0.43  | *                         | *    |
| Rb (µg L <sup>-1</sup> ) | 8.17-8.84     | 8.45   | 0.31  | *                         | *    |
| Si (mg L <sup>-1</sup> ) | 14.84-16.33   | 15.49  | 0.54  | *                         | *    |
| Sr (mg L <sup>-1</sup> ) | 0.75-0.77     | 0.76   | 0.01  | *                         | *    |
| Y (µg L <sup>-1</sup> )  | 0.03-0.07     | 0.05   | 0.02  | *                         | *    |
| Zr (µg L <sup>-1</sup> ) | 0.02-0.03     | 0.02   | <0.01 | *                         | *    |

\* not defined

**Table S3.** An average structure of phytoplankton, zooplankton and planktivorous fish (% of the total density) in three chambers (C-1, C-2, C-3) of the Kamień sedimentation pond during the growing seasons in 2014-2015 and 2018-2019.

|                       | 2014        |             |             | 2015        |             |             | 2018        |             |             | 2019        |             |             |
|-----------------------|-------------|-------------|-------------|-------------|-------------|-------------|-------------|-------------|-------------|-------------|-------------|-------------|
|                       | C-1         | C-2         | C-3         |
| Phytoplankton         |             |             |             |             |             |             |             |             |             |             |             |             |
| Bacillariophyta       | 2.2         | 8.0         | 7.8         | 28.6        | 25.3        | 11.4        | 6.7         | 2.9         | 1.5         | 9.1         | 22.1        | 17.4        |
| Charophyta            | 0.2         | 0.3         | 0.1         | 0.3         | 1.4         | 0.4         | 0.2         | 0.1         | 0.1         | 0.1         | 0           | 0.1         |
| Chlorophyta           | 14.4        | 17.5        | 23.3        | 3.2         | 12.1        | <b>29.5</b> | 4.6         | 7.2         | 1.2         | 13.0        | 18.5        | 13.3        |
| Miozoa                | 0.2         | 0.4         | 0.5         | 0.0         | 0.7         | 0.4         | 0.7         | 0.4         | 0.1         | 0.2         | 0.1         | 0.1         |
| Euglenozoa            | 29.4        | 22.6        | <b>36.9</b> | <b>65.1</b> | <b>51.8</b> | 14.2        | 9.7         | 22.7        | 0.9         | 1.3         | 0.5         | 1.3         |
| Cryptophyta           | <b>51.7</b> | <b>49.9</b> | 31.3        | 2.8         | 3.9         | 28.4        | <b>64.0</b> | 23.2        | 42.0        | <b>75.0</b> | <b>57.8</b> | <b>65.3</b> |
| Ochrophyta            | 1.0         | 1.1         | 0.0         | 0.0         | 4.7         | 15.5        | 14.0        | <b>43.2</b> | <b>54.1</b> | 1.1         | 0.7         | 2.4         |
| Cyanobacteria         | 0.9         | 0.2         | 0.1         | 0.0         | 0.1         | 0.2         | 0.1         | 0.3         | 0.1         | 0.2         | 0.3         | 0.1         |
| Zooplankton           |             |             |             |             |             |             |             |             |             |             |             |             |
| Rotifera              | <b>64.5</b> | <b>84.2</b> | <b>60.0</b> | <b>60.1</b> | <b>75.6</b> | <b>57.9</b> | <b>87.2</b> | <b>88.1</b> | <b>78.1</b> | <b>89.8</b> | <b>91.9</b> | <b>85.3</b> |
| Crustacea             | 35.5        | 15.8        | 40.0        | 39.9        | 24.4        | 42.1        | 12.8        | 11.9        | 21.9        | 10.2        | 8.1         | 14.7        |
| Planktivorous fish    |             |             |             |             |             |             |             |             |             |             |             |             |
| <i>G. cernua</i>      | <b>26.3</b> | 6.3         | 20.4        | 18.9        | 9.9         | 12.7        | 16.1        | 4.5         | 21.0        | 15.4        | 3.3         | 13.1        |
| <i>A. brama</i>       | 16.1        | 6.6         | 21.0        | 21.5        | 3.8         | 12.1        | 16.5        | 0.9         | 4.5         | 15.9        | 1.5         | 2.3         |
| <i>P. fluviatilis</i> | 19.8        | 5.2         | 19.4        | 20.7        | 7.5         | 25.5        | 20.2        | 9.0         | 19.0        | 19.9        | 8.8         | 27.2        |
| <i>R. rutilus</i>     | 21.6        | <b>71.8</b> | <b>30.6</b> | <b>25.7</b> | <b>77.1</b> | <b>43.7</b> | <b>26.6</b> | <b>83.7</b> | <b>54.1</b> | <b>29.6</b> | <b>83.8</b> | <b>56.6</b> |
| <i>A. alburnus</i>    | 16.2        | 10.1        | 8.6         | 13.2        | 1.7         | 6.0         | 20.6        | 1.9         | 1.4         | 19.2        | 2.6         | 0.8         |
